# Supplementary material for: Selenium and phosphide-doped hollow porous N-doped carbon nanobox-based electrospun N-doped carbon nanofibers toward electrochemical sensing of hydrogen peroxide
Source: Royal Society of Chemistry journal article supplement (doi:10.1039/d4nj00091a), 2024-01-01
Supplement: d4nj00091a1.pdf [file d4nj00091a1.pdf]

## Supplementary Material

### **Selenium and phosphide doped hollow porous N-doped carbon nanoboxes based electrospun N-doped carbon nanofibers toward electrochemical sensing of hydrogen peroxide**

**Farzaneh Mohammadi,<sup>a</sup> Mahmoud Roushani,<sup>\*a</sup> and Hadi Hosseini <sup>a</sup>**

*Department of Chemistry, Faculty of Sciences, Ilam University, Ilam, P. O. BOX. 69315-516,  
Iran*

\* Corresponding author: Tel/fax: +98 84 32227022

E-mail address: [m.roushani@ilam.ac.ir](mailto:m.roushani@ilam.ac.ir) and [mahmoudroushani@yahoo.com](mailto:mahmoudroushani@yahoo.com) (M. Roushani)

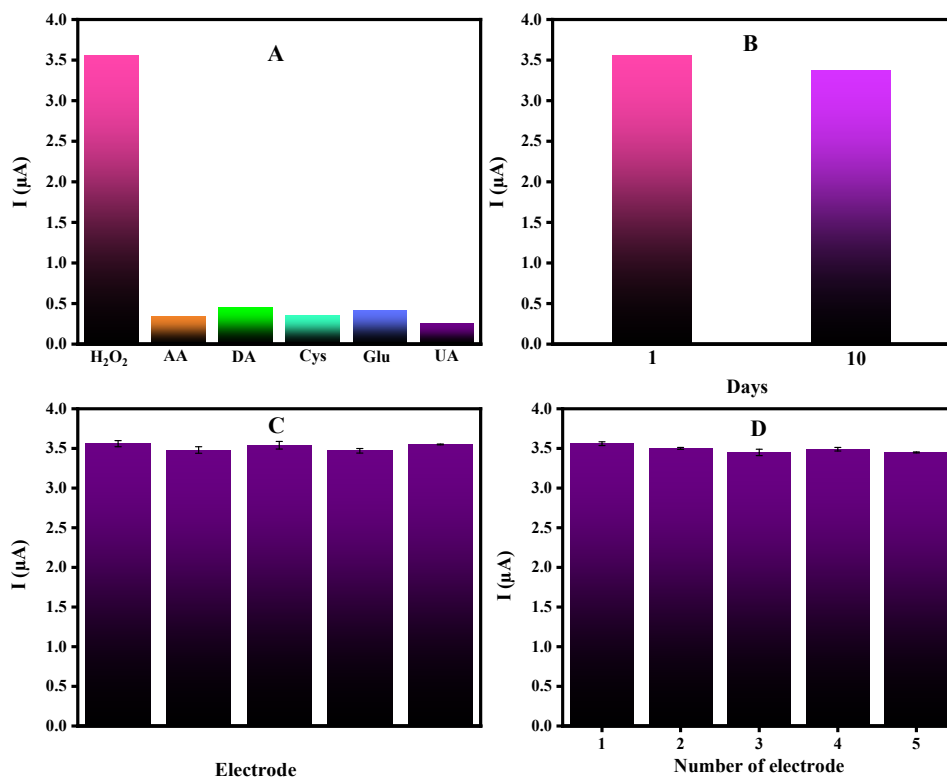

Fig. S1. (A) The histogram for the DPV signal of the Se/P@N-CNBs/CNFs/GCE for the successive addition of 400 μM of H<sub>2</sub>O<sub>2</sub> following by addition of the 50-fold concentration of interfering species (B) long-term stability (C) repeatability and (D) reproducibility of the sensor for H<sub>2</sub>O<sub>2</sub> detection (400 μM).

Table S1. Comparison of proposed nonenzymatic Se/P@N-CNBS/CNFs@GCE sensor with previously reported for electrocatalysis of H<sub>2</sub>O<sub>2</sub> oxidation.

| Electrodes                               | Sensitivity<br>( $\mu\text{A mM}^{-1} \text{cm}^{-2}$ ) | Linear range<br>( $\mu\text{M}$ ) | LOD ( $\mu\text{M}$ ) | References |
|------------------------------------------|---------------------------------------------------------|-----------------------------------|-----------------------|------------|
| GCE/Nafion/Ni                            | -                                                       | 5-500                             | 1.8                   | [1]        |
| CoPc(1)-QDs                              | $2.8 \times 10^5$                                       |                                   | 0.023                 | [2]        |
| [Cu(adp)(BIB)(H <sub>2</sub> O)]n/GC     | -                                                       | 0.1-2.75                          | 0.068                 | [3]        |
| [sub-CYST/Au(pc)]                        | 58.68                                                   | 1-3000                            | 0.8                   | [4]        |
| Co <sub>3</sub> O <sub>4</sub> nanowalls | 1671                                                    | -                                 | 2.8                   | [5]        |
| Pd electrode                             | -                                                       | 0.15–75                           | -                     | [6]        |
| (RhNP@mSiNW)                             | 0.53                                                    | -                                 | -                     | [7]        |
| Se/P@N-CNBS/CNFs                         | 171                                                     | 200-1800                          | 58                    | This work  |

## References

1. M. F. Islam, M. T. Islam, M. M. Hasan, M. M. Rahman, Y. Nagao, M. A. Hasnat, *Talanta*, 2022, **240**, 123202.
2. L. S. Mpeta, T. Nyokong, *J. Electroanal. Chem*, 2019, **840**, 218.
3. C. Zhang, M. Wang, L. Liu, X. Yang, X. Xu, *Electrochem. commun*, 2013, **33**, 131.
4. A. Dutta, M. M. Hasan, M. R. Miah, Y. Nagao, M. A. Hasnat, *Electrochim. Acta*, 2021, **395**, 139217.
5. W. Jia, M. Guo, Z. Zheng, T. Yu, E. G. Rodriguez, Y. Wang, Y. Lei, *J. Electroanal. Chem*, 2009, **625**, 27.
6. C.-L. Hsu, K.-S. Chang, J.-C. Kuo, *Food Control*, 2008, **19**, 223.
7. Z. Song, H. Chang, W. Zhu, C. Xu, X. Feng, *Sci. Rep*, 2015, **5**, 7792.

Table S2: Quantitative analysis of H<sub>2</sub>O<sub>2</sub> in human serum using Se/P@N-CNBs/CNFs modified electrode.

| Sample        | Added ( $\mu\text{mol L}^{-1}$ ) | Founded ( $\mu\text{mol L}^{-1}$ ) | RSD (%) (n = 3) | Recovery (%) (n = 3) |
|---------------|----------------------------------|------------------------------------|-----------------|----------------------|
| human serum 1 | 250                              | 252.74                             | 3.4             | 101                  |
| human serum 2 | 300                              | 289.24                             | 2.8             | 96                   |
| human serum 3 | 350                              | 347.64                             | 2.6             | 99                   |
